# Supplementary material for: Record linkage studies of drug-related deaths among former adult prisoners who have been released to the community: a scoping review protocol
Source: HighWire-hosted journal article supplement (doi:10.1136/bmjopen-2021-056598), 2022-03-01
Supplement: bmjopen-2021-056598supp001_data_supplement.pdf [file bmjopen-2021-056598supp001_data_supplement.pdf]

**Record linkage studies of drug-related deaths among former adult prisoners who have been released to the community: a scoping review protocol**Cooper JA <sup>1,2\*</sup>, Onyeka IN <sup>1,2</sup>, O'Reilly D <sup>1,2</sup>, Kirk R <sup>3</sup>, Donnelly M <sup>1,2</sup><sup>1</sup> Centre for Public Health, Queen's University Belfast, Royal Hospitals Site, Grosvenor Road, Belfast, UK<sup>2</sup> Administrative Data Research Centre Northern Ireland (ADRC NI), Centre for Public Health, Queen's University Belfast, Royal Hospitals Site, Grosvenor Road, Belfast, UK<sup>3</sup> South Eastern Health and Social Care Trust, Ulster Hospital, Dundonald, UK

\*corresponding author

**Supplementary material****Appendix 1**

Ovid MEDLINE(R) ALL &lt;1946 to August 17, 2021&gt;

|    |                                                                                                                                                                                                                                                                                                      |       |
|----|------------------------------------------------------------------------------------------------------------------------------------------------------------------------------------------------------------------------------------------------------------------------------------------------------|-------|
| 1  | Prisoners/                                                                                                                                                                                                                                                                                           | 17290 |
| 2  | ex-prisoner*.mp.                                                                                                                                                                                                                                                                                     | 201   |
| 3  | former prisoner*.mp.                                                                                                                                                                                                                                                                                 | 262   |
| 4  | inmate*.mp.                                                                                                                                                                                                                                                                                          | 5441  |
| 5  | ex-inmate*.mp.                                                                                                                                                                                                                                                                                       | 17    |
| 6  | former inmate*.mp.                                                                                                                                                                                                                                                                                   | 102   |
| 7  | Criminals/                                                                                                                                                                                                                                                                                           | 5440  |
| 8  | ex-criminal*.mp. [mp=title, abstract, original title, name of substance word, subject heading word, floating sub-heading word, keyword heading word, organism supplementary concept word, protocol supplementary concept word, rare disease supplementary concept word, unique identifier, synonyms] | 0     |
| 9  | former criminal*.mp.                                                                                                                                                                                                                                                                                 | 0     |
| 10 | convict*.mp.                                                                                                                                                                                                                                                                                         | 7081  |
| 11 | ex-convict*.mp.                                                                                                                                                                                                                                                                                      | 12    |
| 12 | former convict*.mp.                                                                                                                                                                                                                                                                                  | 3     |
| 13 | detainee*.mp.                                                                                                                                                                                                                                                                                        | 989   |
| 14 | ex-detainee*.mp.                                                                                                                                                                                                                                                                                     | 8     |
| 15 | former detainee*.mp.                                                                                                                                                                                                                                                                                 | 8     |
| 16 | Prisons/                                                                                                                                                                                                                                                                                             | 10227 |

|    |                                                                                                                                                                                                                                                                                                       |        |
|----|-------------------------------------------------------------------------------------------------------------------------------------------------------------------------------------------------------------------------------------------------------------------------------------------------------|--------|
| 17 | Jails/                                                                                                                                                                                                                                                                                                | 66     |
| 18 | gaol*.mp.                                                                                                                                                                                                                                                                                             | 150    |
| 19 | imprison*.mp.                                                                                                                                                                                                                                                                                         | 2645   |
| 20 | incarcerat*.mp. [mp=title, abstract, original title, name of substance word, subject heading word, floating sub-heading word, keyword heading word, organism supplementary concept word, protocol supplementary concept word, rare disease supplementary concept word, unique identifier, synonyms]   | 12802  |
| 21 | detention*.mp.                                                                                                                                                                                                                                                                                        | 3423   |
| 22 | correction*.mp.                                                                                                                                                                                                                                                                                       | 235912 |
| 23 | confinement.mp.                                                                                                                                                                                                                                                                                       | 22002  |
| 24 | Correctional Facilities/                                                                                                                                                                                                                                                                              | 69     |
| 25 | penal institution*.mp.                                                                                                                                                                                                                                                                                | 133    |
| 26 | penitentiary*.mp. [mp=title, abstract, original title, name of substance word, subject heading word, floating sub-heading word, keyword heading word, organism supplementary concept word, protocol supplementary concept word, rare disease supplementary concept word, unique identifier, synonyms] | 693    |
| 27 | remand.mp.                                                                                                                                                                                                                                                                                            | 295    |
| 28 | offender*.mp.                                                                                                                                                                                                                                                                                         | 12056  |
| 29 | ex-offender*.mp.                                                                                                                                                                                                                                                                                      | 102    |
| 30 | former offender*.mp.                                                                                                                                                                                                                                                                                  | 4      |
| 31 | after release.mp.                                                                                                                                                                                                                                                                                     | 4226   |
| 32 | prison release.mp.                                                                                                                                                                                                                                                                                    | 136    |
| 33 | released prisoner*.mp.                                                                                                                                                                                                                                                                                | 134    |
| 34 | following release.mp.                                                                                                                                                                                                                                                                                 | 1117   |
| 35 | recently released.mp.                                                                                                                                                                                                                                                                                 | 1911   |
| 36 | newly released.mp.                                                                                                                                                                                                                                                                                    | 786    |
| 37 | postrelease.mp.                                                                                                                                                                                                                                                                                       | 341    |
| 38 | post-release.mp.                                                                                                                                                                                                                                                                                      | 787    |
| 39 | liberat*.mp.                                                                                                                                                                                                                                                                                          | 38930  |
| 40 | "Cause of Death"/ or Death/                                                                                                                                                                                                                                                                           | 69103  |
| 41 | Mortality/                                                                                                                                                                                                                                                                                            | 47259  |
| 42 | Fatal Outcome/                                                                                                                                                                                                                                                                                        | 65463  |
| 43 | fatal*.mp.                                                                                                                                                                                                                                                                                            | 214521 |

|    |                                                                                                                                                                                                                               |         |
|----|-------------------------------------------------------------------------------------------------------------------------------------------------------------------------------------------------------------------------------|---------|
| 44 | lethal*.mp.                                                                                                                                                                                                                   | 163790  |
| 45 | Substance-Related Disorders/                                                                                                                                                                                                  | 99086   |
| 46 | Opioid-Related Disorders/                                                                                                                                                                                                     | 17378   |
| 47 | drug abuse*.mp.                                                                                                                                                                                                               | 21345   |
| 48 | drug dependen*.mp.                                                                                                                                                                                                            | 6424    |
| 49 | Drug Misuse/ or Prescription Drug Misuse/ or Substance Abuse, Intravenous/                                                                                                                                                    | 18137   |
| 50 | Drug Overdose/12514                                                                                                                                                                                                           |         |
| 51 | drug poisoning.mp.                                                                                                                                                                                                            | 705     |
| 52 | Drug Users/ or Injections, Intravenous/                                                                                                                                                                                       | 85588   |
| 53 | substance abuse*.mp.                                                                                                                                                                                                          | 55910   |
| 54 | substance dependen*.mp.                                                                                                                                                                                                       | 3072    |
| 55 | substance misuse*.mp.                                                                                                                                                                                                         | 3022    |
| 56 | substance use*.mp.                                                                                                                                                                                                            | 42442   |
| 57 | Illicit Drugs/                                                                                                                                                                                                                | 11763   |
| 58 | substance poisoning.mp.                                                                                                                                                                                                       | 17      |
| 59 | street drug*.mp.                                                                                                                                                                                                              | 735     |
| 60 | toxicity.mp.                                                                                                                                                                                                                  | 750642  |
| 61 | Opiate Overdose/ or Analgesics, Opioid/49884                                                                                                                                                                                  |         |
| 62 | Heroin Dependence/ or Heroin/13437                                                                                                                                                                                            |         |
| 63 | drug withdrawal.mp.                                                                                                                                                                                                           | 3932    |
| 64 | accidental poisoning.mp.                                                                                                                                                                                                      | 912     |
| 65 | Benzodiazepines/                                                                                                                                                                                                              | 22377   |
| 66 | Cocaine-Related Disorders/ or Cocaine/ or Crack Cocaine/ or Cocaine Smoking/                                                                                                                                                  | 30584   |
| 67 | Narcotics/                                                                                                                                                                                                                    | 16548   |
| 68 | 1 or 2 or 3 or 4 or 5 or 6 or 7 or 8 or 9 or 10 or 11 or 12 or 13 or 14 or 15 or 16 or 17 or 18 or 19 or 20 or 21 or 22 or 23 or 24 or 25 or 26 or 27 or 28 or 29 or 30 or 31 or 32 or 33 or 34 or 35 or 36 or 37 or 38 or 39 | 353126  |
| 69 | 40 or 41 or 42 or 43 or 44                                                                                                                                                                                                    | 475646  |
| 70 | 45 or 46 or 47 or 48 or 49 or 50 or 51 or 52 or 53 or 54 or 55 or 56 or 57 or 58 or 59 or 60 or 61 or 62 or 63 or 64 or 65 or 66 or 67                                                                                        | 1110035 |
| 71 | 68 and 69 and 70                                                                                                                                                                                                              | 530     |
| 72 | limit 71 to english language                                                                                                                                                                                                  | 473     |
